# Supplementary material for: Unsymmetrical squaraines with new linkage manner for high-performance solution-processed small-molecule organic photovoltaic cells
Source: Royal Society of Chemistry journal article supplement (doi:10.1039/c5ra24186c), 2015-12-15

## Supporting Information

### Unsymmetrical squaraines with new linked manner for high-performance solution-processed small-molecule organic photovoltaic cells†

Lin Yang,‡<sup>a</sup> Daobin Yang,‡<sup>a,b</sup> Yao Chen,<sup>a</sup> Qian Luo,<sup>a</sup> Mangang Zhang,<sup>a</sup> Yan Huang,<sup>\*a</sup> Zhiyun Lu,<sup>\*a</sup> Hisahiro Sasabe,<sup>\*b</sup> and Junji Kido<sup>b</sup>

<sup>a</sup> Key Laboratory of Green Chemistry and Technology (Ministry of Education), College of Chemistry, Sichuan University, Chengdu 610064, P. R. China. E-mail: huangyan@scu.edu.cn, luzhiyun@scu.edu.cn

<sup>b</sup> Department of Organic Device Engineering, Yamagata University, 4-3-16 Jonan, Yonezawa, Yamagata 992-8510, Japan. Email: h-sasabe@yz.yamagata-u.ac.jp.

‡ The first two authors contributed equally to this work.

### Contents

1. **Figure S1.** The <sup>1</sup>H NMR spectrum of **BIBISQ**.
2. **Figure S2.** The <sup>13</sup>C NMR spectrum of **BIBISQ**.
3. **Figure S3.** The HRMS spectrum of **BIBISQ**.
4. **Figure S4.** The <sup>1</sup>H NMR spectrum of **TIBISQ**.
5. **Figure S5.** The <sup>13</sup>C NMR spectrum of **TIBISQ**.
6. **Figure S6.** The HRMS spectrum of **TIBISQ**.

**Figure S1.** The  $^1\text{H}$  NMR spectrum of **BIBISQ**.

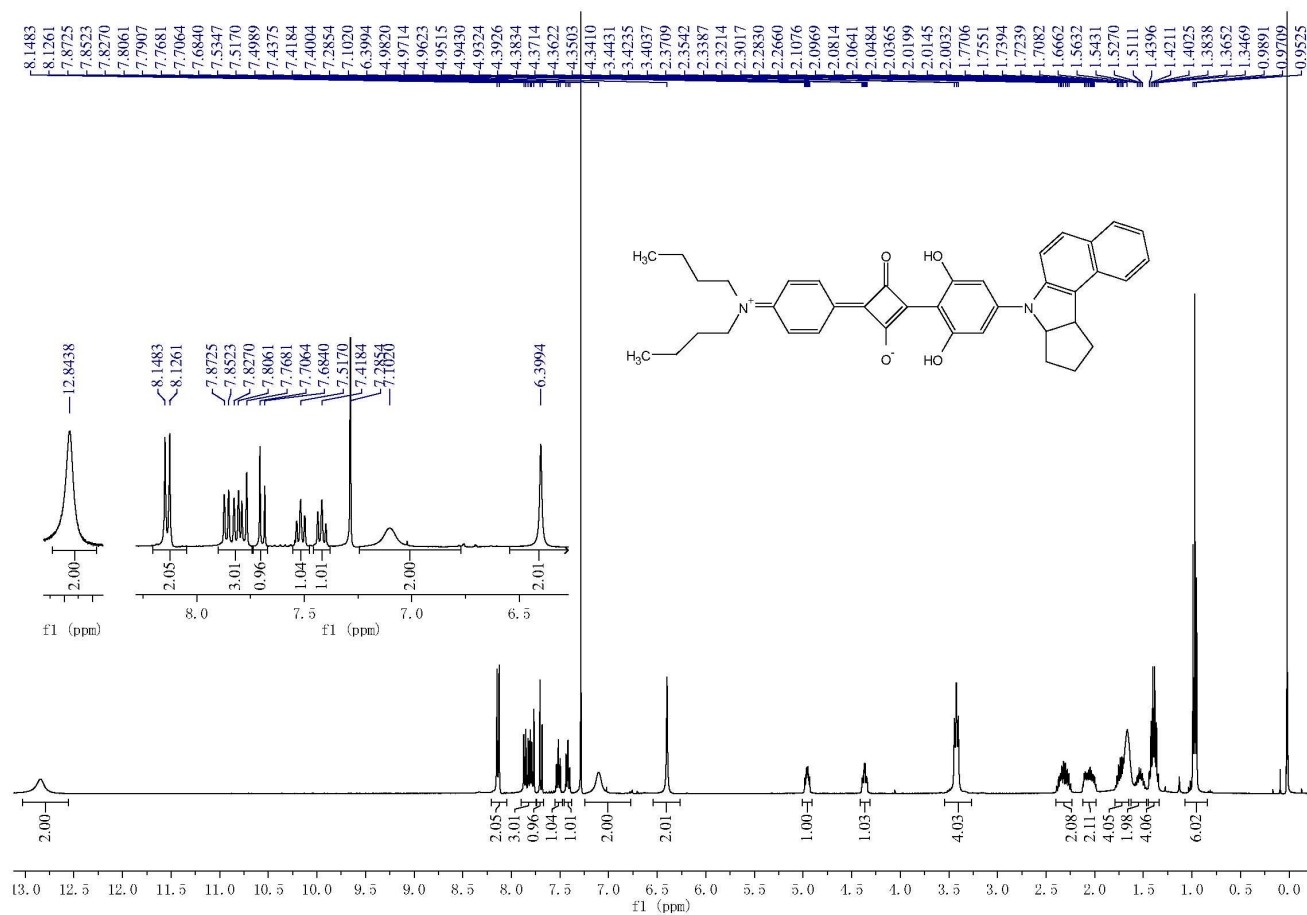

Figure S2. The  $^{13}\text{C}$  NMR spectrum of **BIBISQ**.

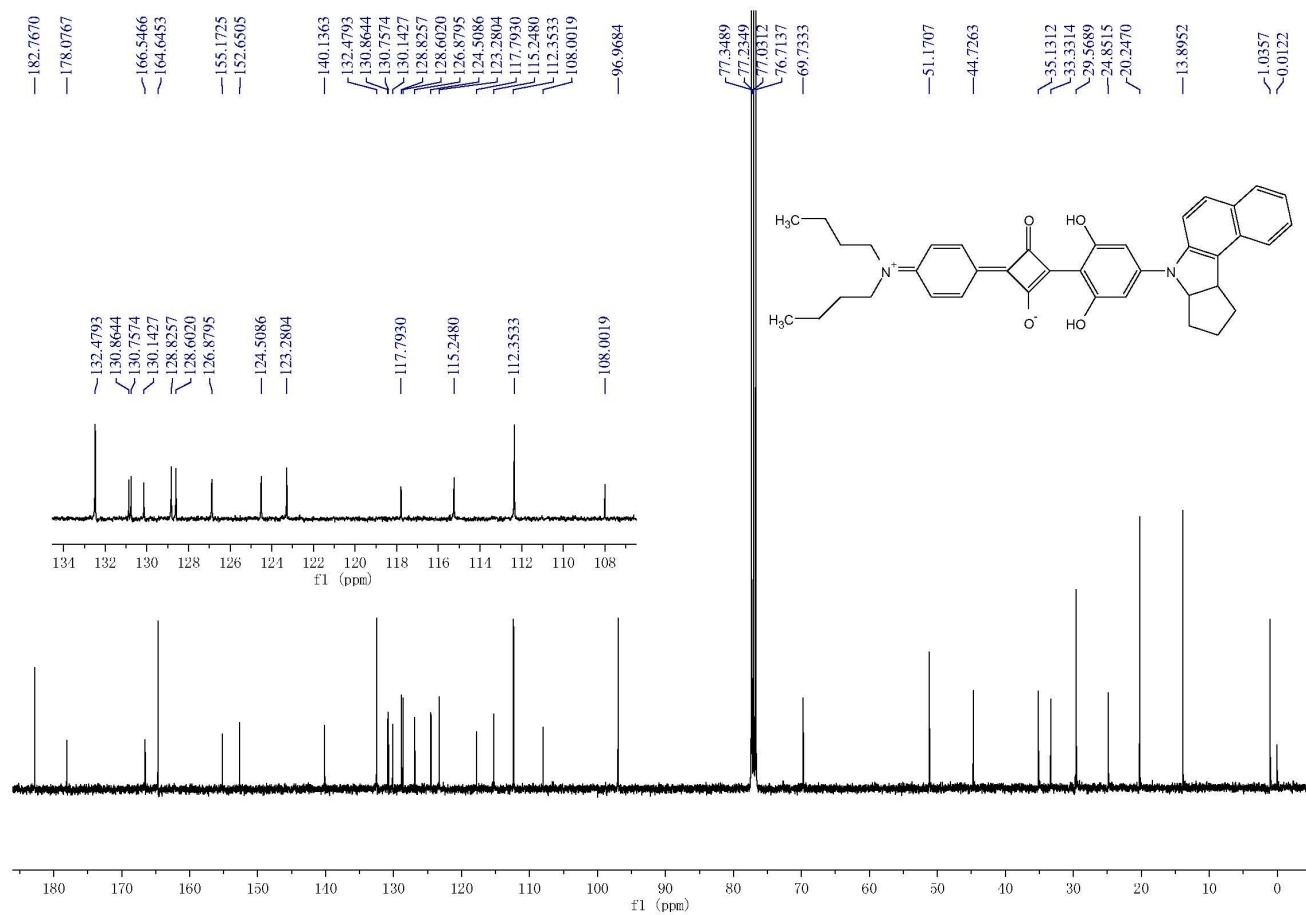

Figure S3. The HRMS spectrum of **BIBISQ**.

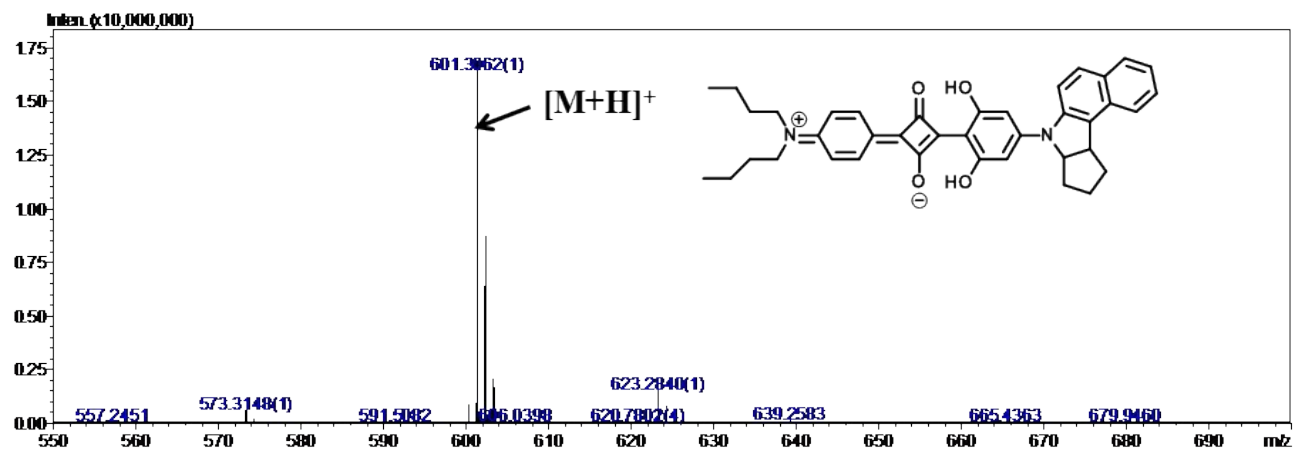

Figure S4. The  $^1\text{H}$  NMR spectrum of TIBISQ.

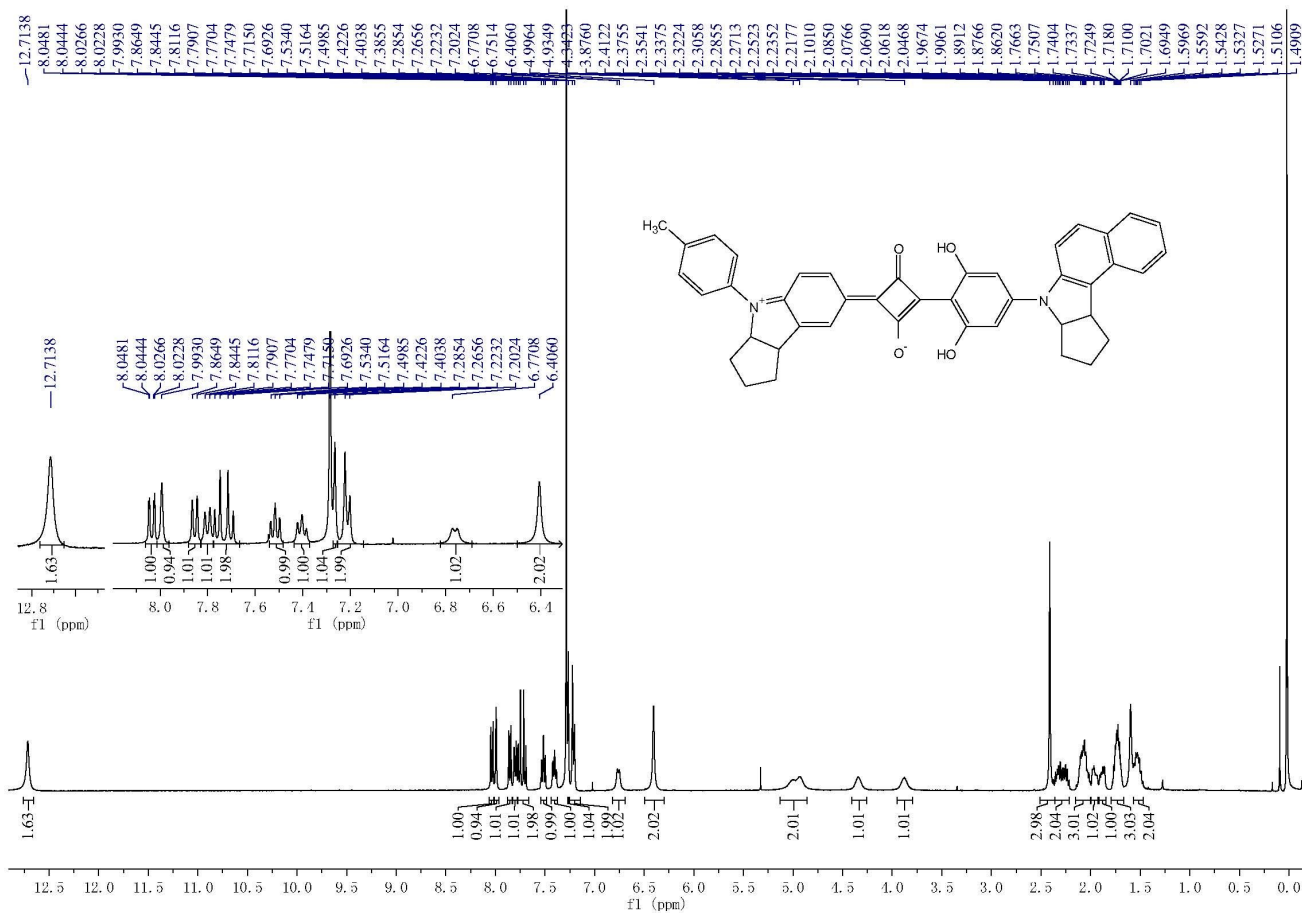

**Figure S5.** The  $^{13}\text{C}$  NMR spectrum of TIBISQ.

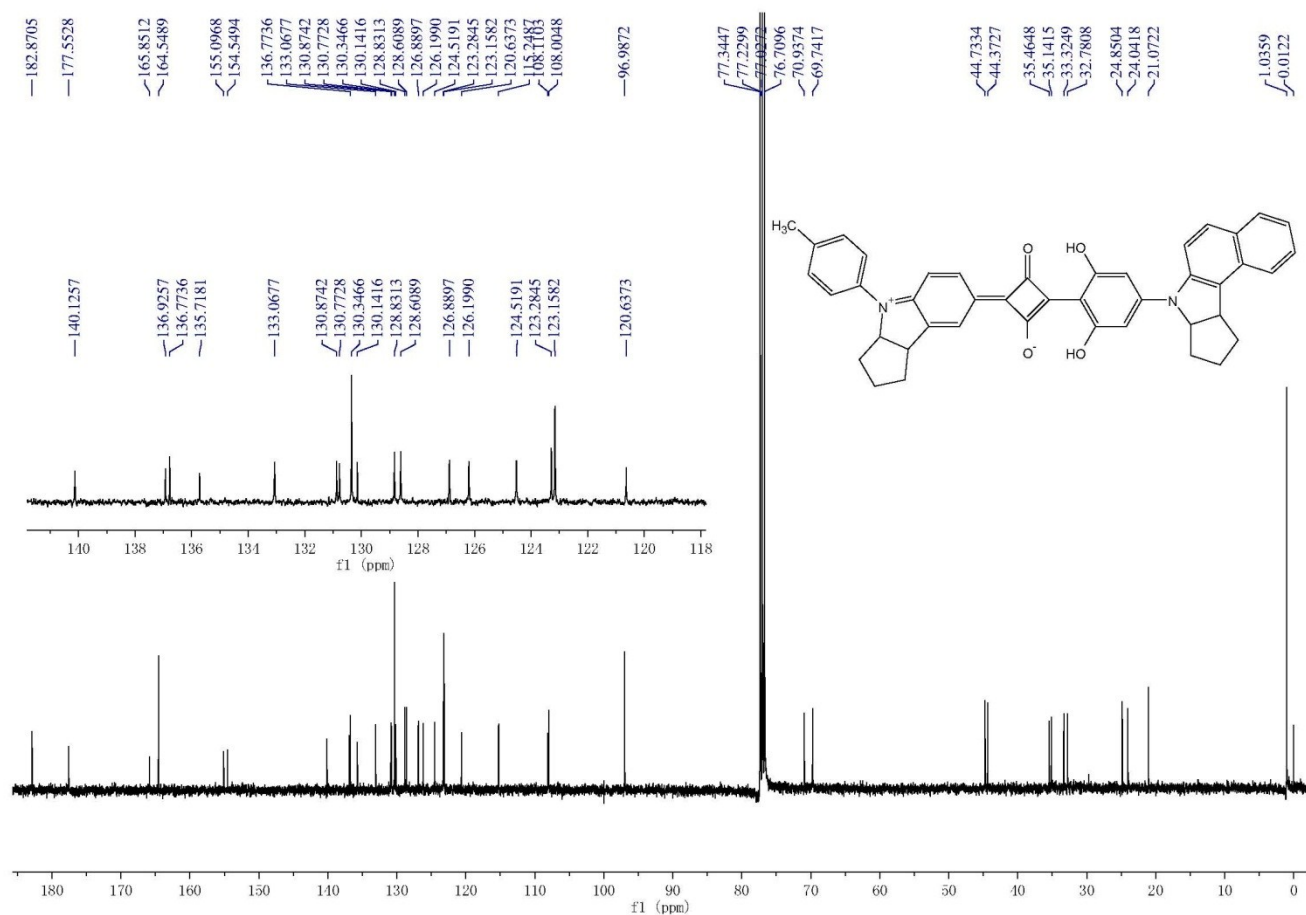

**Figure S6.** The HRMS spectrum of TIBISQ.

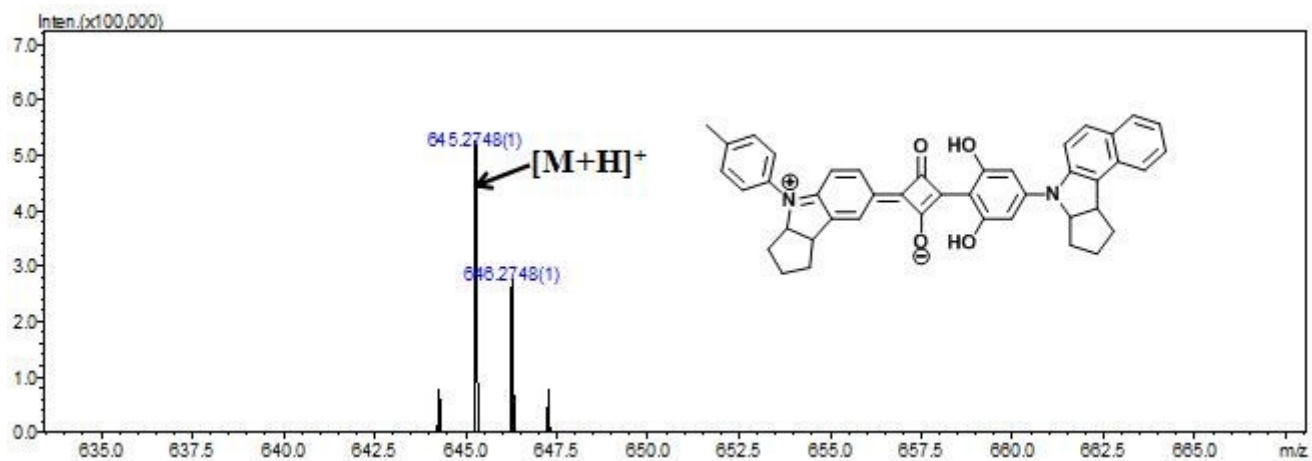

Supplement: c5ra24186c1.pdf [file c5ra24186c1.pdf]
